# Supplementary material for: HPLC–DAD Analysis, SFE-CO2 Extraction, and Antibacterial Activity on Bioactive Compounds from Mosla chinensis Maxim
Source: MDPI journal article supplement (doi:10.3390/molecules28237724), 2023-11-23
Supplement: s1 [file s1]

## Supplementary material

### **HPLC-DAD analysis, SFE-CO<sub>2</sub> extraction and antibacterial activity on bioactive compounds from *Mosla chinensis* maxim**

Rui-xi Gao <sup>1,†</sup>, Bingchen Han <sup>2,†</sup>, Yanfeng Zeng <sup>1</sup>, Linchuang Shen <sup>1</sup>, Xinqiao Liu <sup>1</sup>, Qiang Wang <sup>1</sup>, Maochuan Liao <sup>1,3,\*</sup>, and Jun Li <sup>1,4,\*</sup>

<sup>1</sup> School of Pharmacy, South-Central Minzu University, Wuhan 430074, China

<sup>2</sup> College of Life Sciences, South-Central Minzu University, Wuhan 430074, China

<sup>3</sup> School of Life Sciences, Wuchang University of Technology, Wuhan 430223, China

<sup>4</sup> Ethnopharmacology Level 3 Laboratory, National Administration of Traditional Chinese Medicine, South-Central Minzu University, Wuhan 430074, China

† These authors contributed equally to this work.

\* Correspondence: sippr1976@163.com (M. Liao), lijun-pharm@hotmail.com (J. Li).

## Contents

---

### Supplementary figure:

|   |                                                                             |       |
|---|-----------------------------------------------------------------------------|-------|
| 1 | Thin-layer chromatography (TLC) results for <i>M. chinensis</i> .           | PP. 3 |
| 2 | SFE-CO <sub>2</sub> pilot experiment samples of <i>M. chinensis</i> (10 t). | PP. 4 |
| 3 | Antibacterial zone results for <i>M. chinensis</i> .                        | PP. 5 |

---

### Supplementary table:

|   |                                                                                               |       |
|---|-----------------------------------------------------------------------------------------------|-------|
| 1 | Production of <i>M. chinensis</i> and related planting information of the cultivated species. | PP. 6 |
| 2 | First-hand market price (USD) of <i>M. chinensis</i> (2014-2023).                             | PP. 7 |

---

**Fig. S1.**

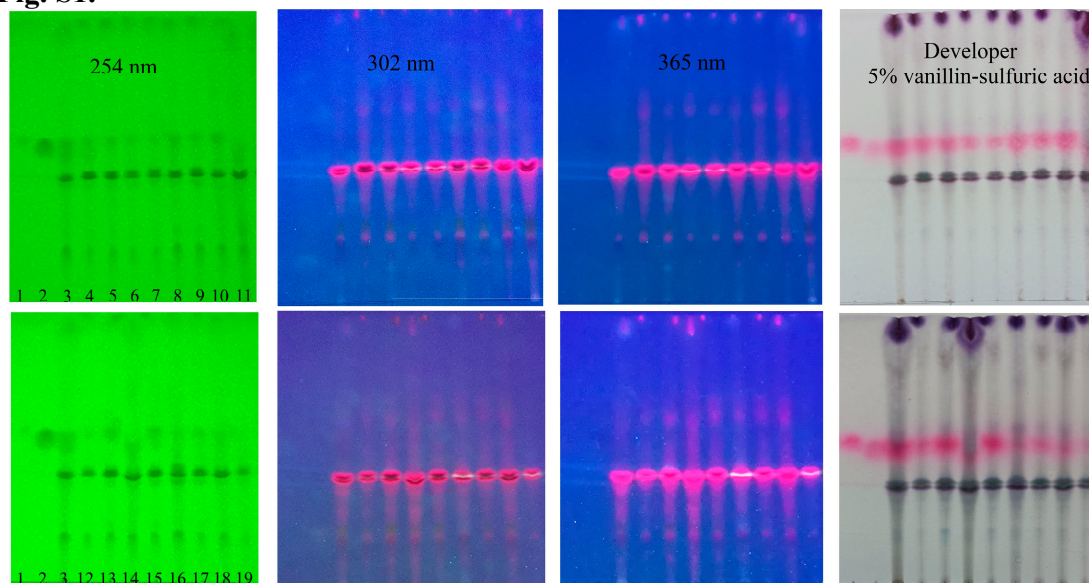

Thin layer chromatography (TLC) results for bioactive compounds from *M. chinensis*.

Two main compounds in *M. chinensis*, thymol (**1**), carvacrol (**2**), together with the standard plant (**3**, *M. chinensis*, identified by National Institutes for Food and Drug Control, Beijing, China) and plants from 16 regions (**4-19**) were analysed and distinguished by UV (254, 302, 365 nm) and chromogenic developer (5% vanillin-sulphuric acid). The mobile phase was hexane:toluene:acetone:acetic acid (2:8:0.5:0.5, v/v).

16 regions were (**4-19**): Anguo (Hebei, **4**); Nanjing (Jiangsu, **5**); Bozhou (Anhui, **6**); Huoshan (Anhui, **7**); Chengdu (Sichuan, **8**); Shennongjia (Hubei, **9**); Panan (Zhejiang, **10**); Quzhou-1 (Zhejiang, **11**); Quzhou-2 (Zhejiang, **12**); Yichun (Jiangxi, **13**); Sanming (Fujian, **14**); Kunming (Yunnan, **15**); Guangzhou (Guangdong, **16**); Jieyang (Guangdong, **17**); Meizhou (Guangdong, **18**) and Yulin (Guangxi, **19**).

**Fig. S2.**

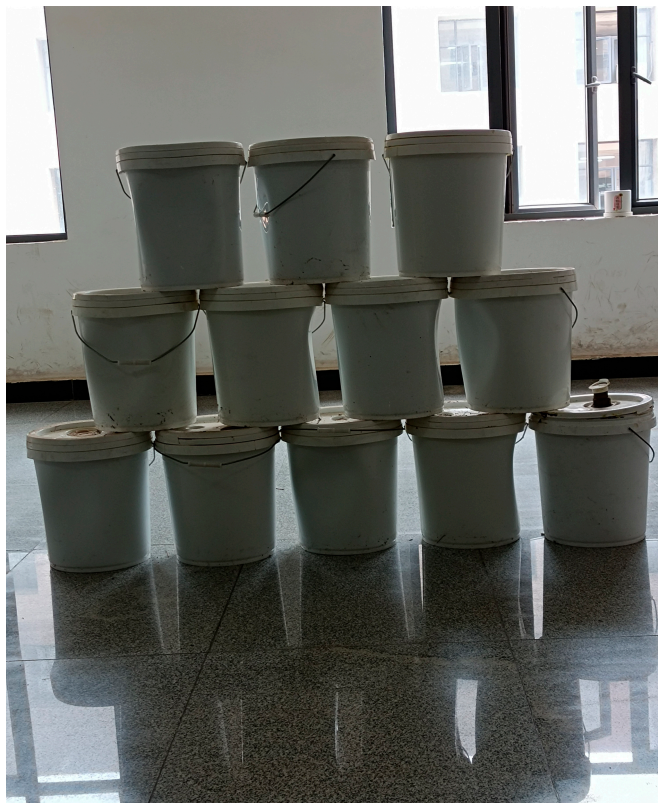

SFE-CO<sub>2</sub> pilot extraction of *M. chinensis*. 10 t plants were used for extraction, yielding 334 kg samples.

**Fig. S3.** Antibacterial zone results for *M. chinensis*, the concentration was 32 µg/mL.

| Name                                               | Antibacterial zone                                                                  | Name                            | Antibacterial zone                                                                    |
|----------------------------------------------------|-------------------------------------------------------------------------------------|---------------------------------|---------------------------------------------------------------------------------------|
| <i>Gardnerella vaginalis</i>                       | 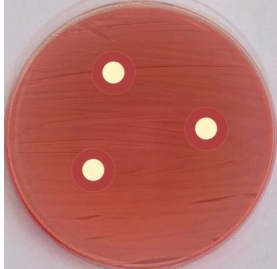   | <i>Helicobacter pylori</i>      |    |
| <i>Propionibacterium acnes</i>                     |    | <i>Malassezia furfur</i>        |    |
| <i>Staphylococcus aureus</i>                       |   | <i>Aspergillus flavus</i>       |   |
| <i>Staphylococcus epidermidis</i>                  |  | <i>Epidermophyton floccosum</i> |  |
| methicillin-resistant <i>Staphylococcus aureus</i> |  |                                 |                                                                                       |

**Table S1.** Estimated production of *M. chinensis* and the planting information for the cultivated species.

|                                                                                                                            |                                                                        |
|----------------------------------------------------------------------------------------------------------------------------|------------------------------------------------------------------------|
| Estimated total plant production                                                                                           | 1900 t (2021), 2200 t (2020)                                           |
| Planting information on cultivated <i>M. chinensis</i> in Jiangxi Province and Shaoyang city, Hunan province, China (2022) |                                                                        |
| Planting scale                                                                                                             | 2000 mu, 133.4 hectares, 1.33 km <sup>2</sup> (1 mu = 0.0667 hectares) |
| Production                                                                                                                 | 300 kg/mu                                                              |
| Estimated total production                                                                                                 | 600 t                                                                  |

**Table S2.** First-hand market price (USD) of *M. chinensis*. Those data were collected from the herb markets in Anhui, Hubei, Hunan, Jiangxi and Hebei provinces, China.

| Time (Year-Month) | Price (\$)/kg |
|-------------------|---------------|
| 2014-12           | 0.9117        |
| 2015-01           | 0.9117        |
| 2015-05           | 0.9117        |
| 2015-09           | 0.8682        |
| 2015-10           | 0.7235        |
| 2016-06           | 0.7235        |
| 2016-09           | 0.7235        |
| 2017-01           | 0.7235        |
| 2017-06           | 0.7235        |
| 2017-12           | 0.7235        |
| 2018-01           | 0.6512        |
| 2018-05           | 0.6512        |
| 2018-10           | 0.6512        |
| 2018-11           | 0.7959        |
| 2019-04           | 0.7959        |
| 2019-12           | 0.7959        |
| 2020-01           | 0.7959        |
| 2020-06           | 0.7959        |
| 2020-12           | 0.7959        |
| 2021-06           | 0.7959        |
| 2021-12           | 0.7959        |
| 2022-04           | 0.7959        |
| 2022-09           | 0.7959        |
| 2022-10           | 1.0130        |
| 2022-11           | 1.0130        |
| 2023-01           | 1.0130        |
